# Supplementary material
Source: publisher figshare collection journal article supplement (https://springernature.figshare.com/ndownloader/files/18656600)
Supplement: Supplementary file 1 [file 18656600]

Measurement(s),response to temperature stimulus • Demographics • temperature of air • room temperature ambient air • humidity • geographic location • Natural Language
Technology Type(s),Survey • sensor
Sample Characteristic - Organism,Homo sapiens
Sample Characteristic - Environment,building
Sample Characteristic - Location,Australia • Brazil • Chile • China • Kingdom of Denmark • Ecuador • French Republic • Germany • Greece • India • Indonesia • Iran • Iraq • Italy • Japan • Jordan • Malaysia • Nigeria • Oman • Poland • South Korea • Kingdom of Spain • Sri Lanka • Sweden • Republic of China • Kingdom of the Netherlands • Uganda • United Arab Emirates • United Kingdom • United States of America
